# Supplementary material for: Influenza Immunization Practices and Policies for Health Care Students in Canada
Source: Hindawi journal article supplement (doi:10.1155/2013/569421), 2013-01-01
Supplement: f1 [file 569421.f1.pdf]

**SUPPLEMENTARY ONLINE TABLE 1**  
**Disciplines and schools of key informants in phase I interviews**

| Discipline                    | School/program                                                                            |
|-------------------------------|-------------------------------------------------------------------------------------------|
| Medicine                      | Dalhousie Faculty of Medicine                                                             |
| Nursing                       | Dalhousie School of Nursing<br>Nova Scotia Community College Practical Nursing            |
| Physiotherapy                 | Dalhousie School of Physiotherapy                                                         |
| Dentistry                     | Dalhousie Faculty of Dentistry                                                            |
| Social work                   | Dalhousie School of Social Work                                                           |
| Occupational therapy          | Dalhousie School of Occupational Therapy                                                  |
| Pharmacy                      | Dalhousie College of Pharmacy                                                             |
| Respiratory therapy           | Dalhousie School of Health Sciences:<br>Respiratory Therapy                               |
| Diagnostic medical ultrasound | Dalhousie School of Health Sciences:<br>Diagnostic Medical Ultrasound                     |
| Radiologic technology         | Dalhousie School of Health Sciences:<br>Radiologic Technology                             |
| Nuclear medicine technology   | Dalhousie School of Health Sciences:<br>Nuclear Medicine Technology                       |
| Psychology                    | Dalhousie Clinical Psychology<br>IWK PhD Psychology Residency                             |
| Clinical vision science       | Dalhousie Clinical Vision Science                                                         |
| Speech & language pathology   | Dalhousie School of Human Communication<br>Disorders: Speech & Language Pathology         |
| Audiology                     | Dalhousie School of Human Communication<br>Disorders: Audiology                           |
| Child & Youth Study           | Mount Saint Vincent University School of<br>Professional Studies: Child & Youth Studies   |
| Applied human nutrition       | Mount Saint Vincent University School of<br>Professional Studies: Applied Human Nutrition |
| Paramedicine                  | Maritime School of Paramedicine                                                           |
| Spiritual care                | IWK Spiritual Care Program                                                                |

**SUPPLEMENTARY ONLINE TABLE 2**  
**Disciplines and schools of potential participants in the national survey**

| Discipline | School                             |
|------------|------------------------------------|
| Medicine   | University of Alberta              |
|            | University of British Columbia     |
|            | University of Saskatchewan         |
|            | University of Manitoba             |
|            | McMaster University                |
|            | Northern Ontario                   |
|            | University of Ottawa               |
|            | Queen's University                 |
|            | University of Western Ontario      |
|            | University of Toronto              |
|            | Memorial University                |
|            | McGill University                  |
|            | University of Calgary              |
|            | Aurora College                     |
|            | Cape Breton University             |
|            | Memorial University                |
| Nursing    | St. Francis Xavier University      |
|            | University of New Brunswick        |
|            | Université de Moncton              |
|            | University of Prince Edward Island |
|            | Western Regional School of Nursing |
|            | La Cité Collégiale                 |
|            | McGill University                  |
|            |                                    |

**TABLE 2 – CONTINUED**

|                                                    |
|----------------------------------------------------|
| Université de Montréal                             |
| Université de Sherbrooke                           |
| Université du Québec à Chicoutimi                  |
| Université du Québec à Rimouski                    |
| Université du Québec à Trois Rivières              |
| Université du Québec en Abitibi-Témiscamingue      |
| L'Université du Québec en Outaouais                |
| Université Laval                                   |
| Algonquin College                                  |
| Brock University                                   |
| Cambrian College of Applied Arts & Technology      |
| Centennial College                                 |
| Centre for Nursing Studies                         |
| College of New Caledonia                           |
| Conestoga College Institute                        |
| Confederation College                              |
| Durham College of Applied Arts & Technology        |
| Fanshawe College of Applied Arts & Technology      |
| First Nations University of Canada                 |
| Fleming College                                    |
| George Brown College                               |
| Georgian College of Applied Arts & Technology      |
| Humber Institute of Technology & Advanced Learning |
| Lakehead University                                |
| Lambton College of Applied Arts a& Technology      |
| Laurentian University                              |
| Loyalist College of Applied Arts & Technology      |
| McMaster University                                |
| Mohawk College                                     |
| Nipissing University                               |
| Northern College of Applied Arts & Technology      |
| Queen's University                                 |
| Ryerson University                                 |
| Sault College                                      |
| Seneca College of Applied Arts & Technology        |
| St. Clair College                                  |
| St. Lawrence College                               |
| Trent University                                   |
| University of Ontario Institute of Technology      |
| University of Ottawa                               |
| University of Toronto                              |
| University of Western Ontario                      |
| University of Windsor                              |
| York University                                    |
| Athabasca University                               |
| Brandon University                                 |
| British Columbia Institute of Technology           |
| Camosun College                                    |
| Canadore College                                   |
| College of the Rockies                             |
| Douglas College                                    |
| Grande Prairie Regional College                    |
| Grant MacEwan University                           |
| Keyano College                                     |
| Kwantlen Polytechnic University                    |
| Langara College                                    |
| Lethbridge Community College                       |
| Medicine Hat College                               |
| Mount Royal University                             |

TABLE 2 – CONTINUED

|                         |                                                          |
|-------------------------|----------------------------------------------------------|
|                         | North Island College                                     |
|                         | Red Deer College                                         |
|                         | Red River College                                        |
|                         | Selkirk College                                          |
|                         | Saskatchewan Institute of Applied Science and Technology |
|                         | Thompson Rivers University                               |
|                         | Trinity Western University                               |
|                         | University College of the Fraser Valley                  |
|                         | University College of the North                          |
|                         | University of Alberta                                    |
|                         | University of British Columbia                           |
|                         | University of British Columbia – Okanagan                |
|                         | University of Calgary                                    |
|                         | University of Lethbridge                                 |
|                         | University of Manitoba                                   |
|                         | University of Northern British Columbia                  |
|                         | University of Saskatchewan                               |
|                         | University of Victoria                                   |
|                         | Vancouver Island University                              |
| Physiotherapy           | University of British Columbia                           |
|                         | University of Alberta                                    |
|                         | University of Saskatchewan                               |
|                         | University of Manitoba                                   |
|                         | University of Western Ontario                            |
|                         | University of Toronto                                    |
|                         | Ottawa University                                        |
|                         | Queen's University                                       |
|                         | McGill University                                        |
|                         | McMaster University                                      |
|                         | Université de Montréal                                   |
|                         | Université de Sherbrooke                                 |
|                         | Université Laval                                         |
| Occupational therapy    | University of British Columbia                           |
|                         | University of Alberta                                    |
|                         | University of Manitoba                                   |
|                         | University of Toronto                                    |
|                         | University of Western Ontario                            |
|                         | McMaster University                                      |
|                         | Queen's University                                       |
|                         | University of Ottawa                                     |
|                         | Université de Montréal                                   |
|                         | McGill University                                        |
|                         | Université Laval                                         |
|                         | Université de Sherbrooke                                 |
|                         | Université du Québec                                     |
| Pharmacy                | Memorial University of Newfoundland                      |
|                         | Université de Montreal                                   |
|                         | Université Laval                                         |
|                         | University of Alberta                                    |
|                         | University of British Columbia                           |
|                         | University of Manitoba                                   |
|                         | University of Saskatchewan                               |
|                         | University of Toronto                                    |
|                         | University of Waterloo                                   |
| Nutrition and dietetics | University of British Columbia                           |
|                         | University of Alberta                                    |
|                         | University of Saskatchewan                               |
|                         | University of Manitoba                                   |
|                         | University of Western Ontario                            |

TABLE 2 – CONTINUED

|                     |                                                                 |
|---------------------|-----------------------------------------------------------------|
|                     | University of Guelph                                            |
|                     | Ryerson University                                              |
|                     | University of Ottawa                                            |
|                     | McGill University                                               |
|                     | Université de Montréal                                          |
|                     | Université Laval                                                |
|                     | University of Prince Edward Island                              |
|                     | St. Francis Xavier University                                   |
|                     | Acadia University                                               |
|                     | Université de Moncton                                           |
|                     | Memorial University of Newfoundland                             |
| Respiratory therapy | Northern Alberta Institute of Technology                        |
|                     | Southern Alberta Institute of Technology                        |
|                     | Thompson Rivers University                                      |
|                     | University of Manitoba                                          |
|                     | New Brunswick Community College                                 |
|                     | Université de Moncton                                           |
|                     | College of the North Atlantic                                   |
|                     | The Michener Institute for Applied Health Sciences              |
|                     | Algonquin College of Applied Arts & Technology                  |
|                     | Canadore College of Applied Arts & Technology                   |
|                     | La Cité collégiale                                              |
|                     | Fanshawe College of Applied Arts & Technology                   |
|                     | Conestoga College Institute of Technology and Advanced Learning |
|                     | Vanier College                                                  |
|                     | Le Cégep de Ste-Foy                                             |
|                     | Le Cégep de Sherbrooke                                          |
|                     | Collège de Rosemont                                             |
|                     | Cégep de Chicoutimi                                             |
|                     | Collège Ellis                                                   |
| Dentistry           | University of Alberta                                           |
|                     | University of British Columbia                                  |
|                     | University of Manitoba                                          |
|                     | University of Toronto                                           |
|                     | University of Western Ontario                                   |
|                     | McGill University                                               |
|                     | Université de Montreal                                          |
|                     | Université Laval                                                |
|                     | University of Saskatchewan                                      |
| Child life          | McMaster University                                             |
|                     | University of Victoria                                          |
|                     | University of the Fraser Valley                                 |
|                     | Cambrian College                                                |
| Social work         | Carleton University                                             |
|                     | Collège universitaire de Saint-Boniface                         |
|                     | First Nations University                                        |
|                     | King's University College                                       |
|                     | Lakehead University                                             |
|                     | Laurentian University                                           |
|                     | Laurentian University Native Human Services                     |
|                     | McGill University                                               |
|                     | McMaster University                                             |
|                     | Memorial University of Newfoundland                             |
|                     | Nicola Valley Institute of Technology                           |
|                     | Renison College                                                 |
|                     | Ryerson University                                              |
|                     | St. Thomas University                                           |
|                     | Thompson Rivers University                                      |
|                     | Université de Moncton                                           |

TABLE 2 – CONTINUED

|              |                                                 |
|--------------|-------------------------------------------------|
| Paramedicine | Ottawa University                               |
|              | Université de Sherbrooke                        |
|              | Université Laval                                |
|              | Université du Québec à Chicoutimi               |
|              | Université du Québec à Montréal                 |
|              | Université du Québec en Abitibi-Témiscamingue   |
|              | Université du Québec en Outaouais               |
|              | University of British Columbia                  |
|              | University of British Columbia – Okanagan       |
|              | University of Calgary                           |
|              | University of Manitoba                          |
|              | University of Regina                            |
|              | University of the Fraser Valley                 |
|              | University of Northern British Columbia         |
|              | University of Toronto                           |
|              | University of Victoria                          |
|              | University of Windsor                           |
|              | Wilfrid Laurier University                      |
|              | York University                                 |
|              | Alberta Health & Safety Training Institute      |
|              | University of Alberta Lakeland College          |
|              | Emergency Services Academy                      |
|              | Flatline Response Inc.                          |
|              | Keyano College                                  |
|              | Lacombe Municipal Ambulance Service Association |
|              | Medicine Hat College                            |
|              | Northern Alberta Institute of Technology        |
|              | Northern Lakes College                          |
|              | Professional Medical Associates                 |
|              | Southern Alberta Institute of Technology        |

TABLE 2 – CONTINUED

|                                                                 |
|-----------------------------------------------------------------|
| Academy of Emergency Training                                   |
| Justice Institute of British Columbia Paramedic Academy         |
| Criti Care EMS                                                  |
| Emergency Rescue Response Service Inc                           |
| Red River College                                               |
| Winnipeg Fire Paramedic Service                                 |
| Atlantic Paramedic Academy                                      |
| College of the North Atlantic                                   |
| Algonguin College of Applied Arts & Technology                  |
| Cambrian College                                                |
| Conestoga College Institute of Technology and Advanced Learning |
| Confederation College of Applied Arts & Technology              |
| CTS Canadian Career College                                     |
| Durham College                                                  |
| Fanshawe College of Applied Arts & Technology                   |
| Georgian College of Applied Arts & Technology                   |
| Humber Institute of Technology and Advanced Learning            |
| La Cité collégiale                                              |
| Lambton College of Applied Arts & Technology                    |
| Niagara College of Applied Arts & Technology                    |
| Loyalist College                                                |
| Toronto EMS                                                     |
| Holland College                                                 |
| Cégep John Abbott College                                       |
| Collège Ahuntsic                                                |
| Saskatchewan Institute of Applied Science and Technology        |
